# Supplementary material
Source: PubMed Central journal article supplement (PMC5030077)
Supplement: NIHMS779545-supplement-Supplementary_Material.pdf [file NIHMS779545-supplement-Supplementary_Material.pdf]

## Supplemental Appendix

Figure S1: Results for ignorable scenarios 1-4 (minimized distance)

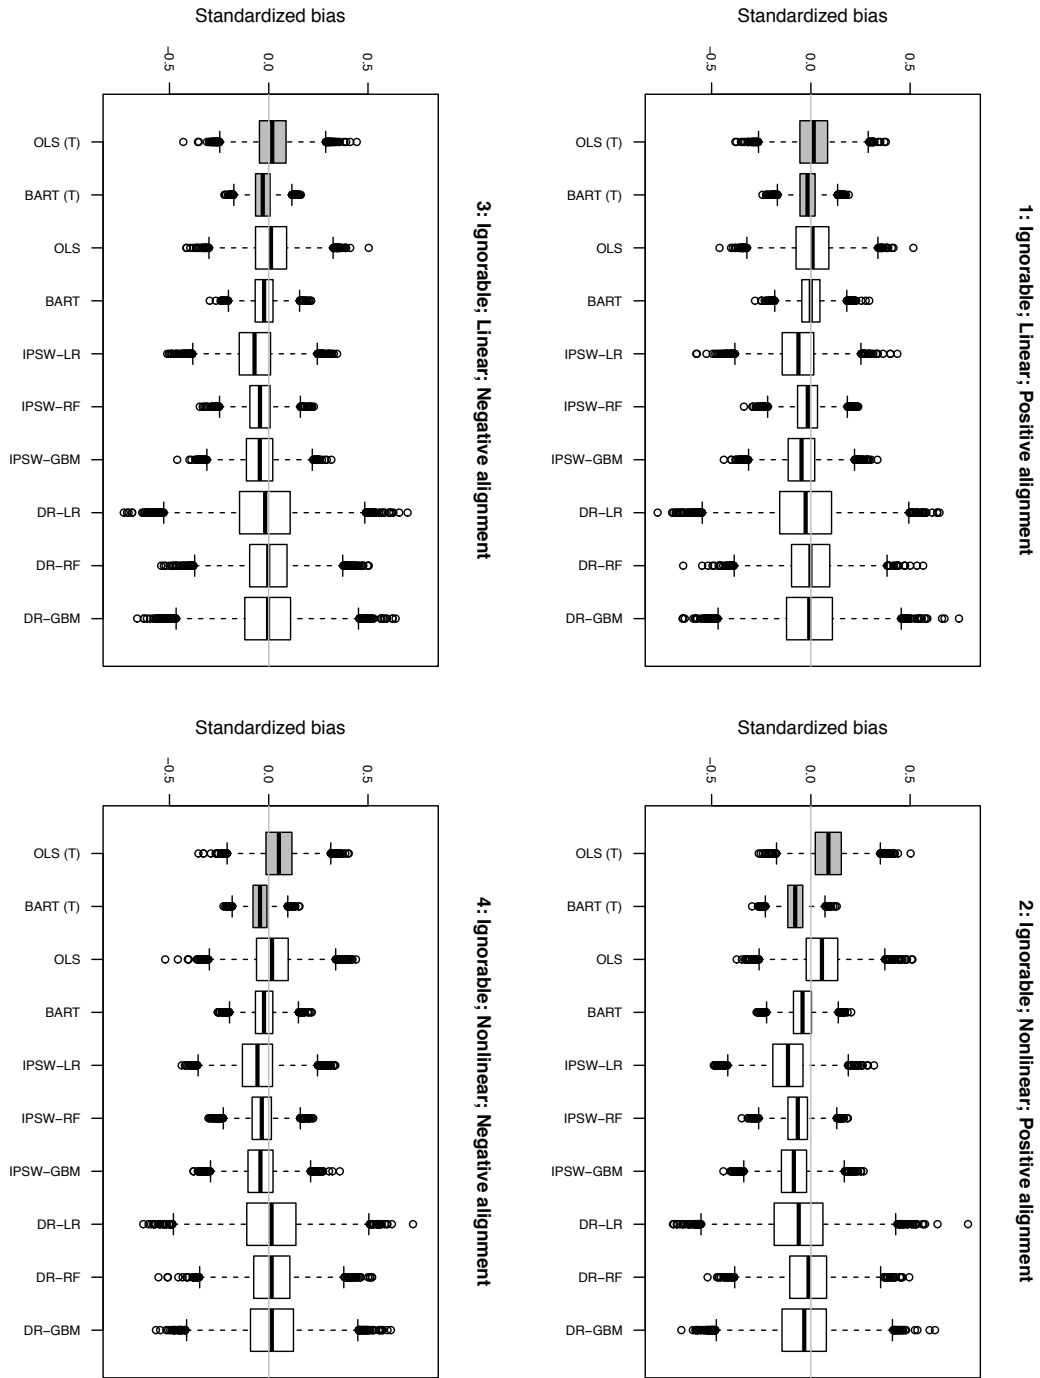

Figure S2: Results for non-ignorable scenarios 5-8 (minimized distance)

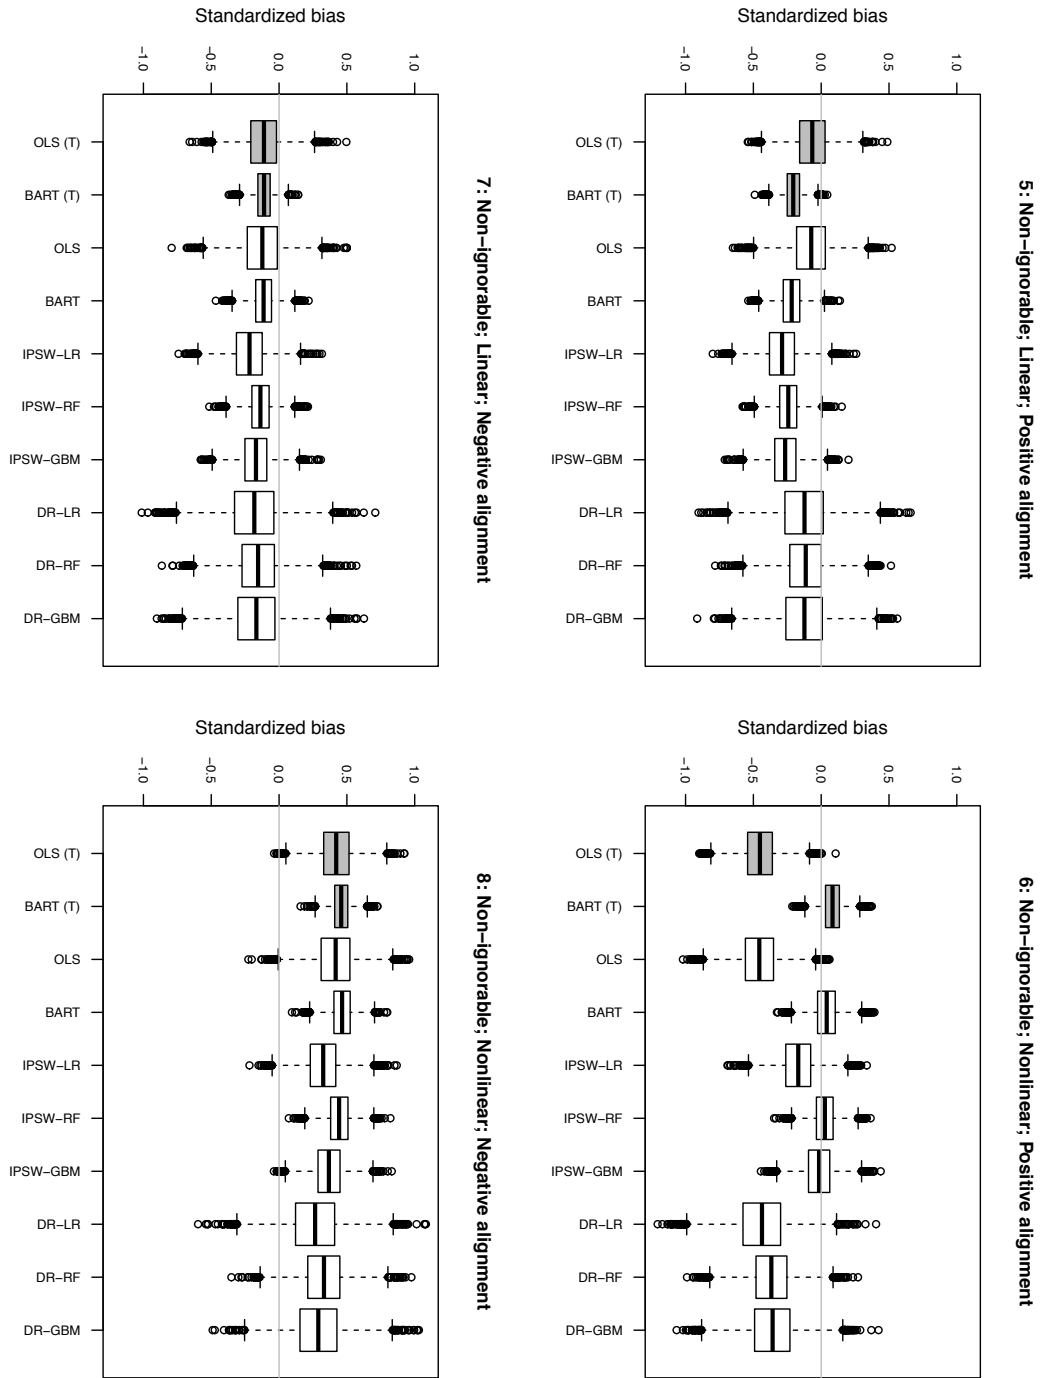

Table S1: Alignment Simulations with reduced sample size: Standardized bias and RSMSE

| Alignment | Standardized bias |          | RSMSE    |          |
|-----------|-------------------|----------|----------|----------|
|           | Positive          | Negative | Positive | Negative |
| OLS (T)   | -0.036            | -0.021   | 0.064    | 0.069    |
| BART (T)  | -0.047            | -0.028   | 0.061    | 0.040    |
| OLS       | -0.036            | -0.021   | 0.066    | 0.070    |
| BART      | -0.065            | -0.042   | 0.082    | 0.056    |
| IPSW-LR   | -0.031            | -0.024   | 0.073    | 0.084    |
| IPSW-RF   | -0.218            | -0.143   | 0.224    | 0.156    |
| IPSW-GBM  | -0.043            | -0.037   | 0.072    | 0.075    |
| DR-LR     | -0.009            | -0.009   | 0.056    | 0.067    |
| DR-RF     | -0.024            | -0.018   | 0.060    | 0.064    |
| DR-GBM    | -0.015            | -0.020   | 0.054    | 0.059    |

Note: The table shows standardized bias and RSMSE averaged over 10,000 simulated datasets for the alignment simulations discussed in the text. Standardized Bias refers to bias divided by the standard deviation of the outcome in the target dataset. RSMSE refers to Root Standardized Mean Square Error. (T) refers to simulations in which control outcomes are available in the target dataset. OLS denotes linear regression; BART denotes Bayesian Additive Regression Trees; IPSW-LR (IPSW-RF/IPSW-GBM) denotes inverse propensity score weighting with propensity scores estimated using logistic regression (random forests/boosting); DR-LR (DR-RF/DR-GBM) refers to double robust weighted linear regression models with propensity scores estimated using logistic regression (random forests/boosting).

Table S2: Standardized bias (minimized distance)

| Scenario | 1     | 2     | 3     | 4     | 5     | 6     | 7     | 8    | avg bias<br>ignorable | avg bias<br>non-ignorable |
|----------|-------|-------|-------|-------|-------|-------|-------|------|-----------------------|---------------------------|
| OLS (T)  | 0.01  | 0.09  | 0.02  | 0.05  | -0.07 | -0.45 | -0.11 | 0.42 | 0.04                  | -0.05                     |
| BART (T) | -0.02 | -0.08 | -0.03 | -0.04 | -0.21 | 0.08  | -0.11 | 0.46 | -0.04                 | 0.06                      |
| OLS      | 0.01  | 0.06  | 0.01  | 0.02  | -0.08 | -0.46 | -0.12 | 0.42 | 0.02                  | -0.06                     |
| BART     | 0.00  | -0.04 | -0.02 | -0.02 | -0.22 | 0.04  | -0.11 | 0.46 | -0.02                 | 0.04                      |
| IPSW-LR  | -0.06 | -0.12 | -0.07 | -0.06 | -0.29 | -0.17 | -0.22 | 0.33 | -0.08                 | -0.09                     |
| IPSW-RF  | -0.02 | -0.07 | -0.04 | -0.04 | -0.24 | 0.03  | -0.14 | 0.44 | -0.04                 | 0.02                      |
| IPSW-GBM | -0.05 | -0.09 | -0.05 | -0.04 | -0.27 | -0.02 | -0.17 | 0.37 | -0.06                 | -0.02                     |
| DR-LR    | -0.03 | -0.06 | -0.02 | 0.01  | -0.13 | -0.44 | -0.18 | 0.27 | -0.02                 | -0.12                     |
| DR-RF    | 0.00  | -0.01 | 0.00  | 0.02  | -0.11 | -0.37 | -0.15 | 0.33 | 0.00                  | -0.08                     |
| DR-GBM   | -0.01 | -0.03 | 0.00  | 0.02  | -0.13 | -0.36 | -0.17 | 0.29 | -0.01                 | -0.09                     |

Note: All results reported here average over 10,000 simulated datasets. Covariate distances between experimental and target datasets are minimized (see text). See Figures ?? and ?? for a description of the scenarios. (T) refers to simulations in which control outcomes are available in the target dataset. OLS denotes linear regression; BART denotes Bayesian Additive Regression Trees; IPSW-LR (IPSW-RF/IPSW-GBM) denotes inverse propensity score weighting with propensity scores estimated using logistic regression (random forests/boosting); DR-LR (DR-RF/DR-GBM) refers to double robust weighted linear regression models with propensity scores estimated using logistic regression (random forests/boosting). The last two columns show the average standardized bias for the ignorable (1-4) and non-ignorable (5-8) scenarios.

Table S3: RSMSE (minimized distance)

| Scenario | 1    | 2    | 3    | 4    | 5    | 6    | 7    | 8    | avg RSMSE<br>ignorable | avg RSMSE<br>non-ignorable |
|----------|------|------|------|------|------|------|------|------|------------------------|----------------------------|
| OLS (T)  | 0.10 | 0.13 | 0.10 | 0.11 | 0.15 | 0.47 | 0.18 | 0.44 | 0.11                   | 0.31                       |
| BART (T) | 0.06 | 0.10 | 0.06 | 0.07 | 0.22 | 0.11 | 0.13 | 0.46 | 0.07                   | 0.23                       |
| OLS      | 0.12 | 0.13 | 0.12 | 0.12 | 0.18 | 0.48 | 0.20 | 0.45 | 0.12                   | 0.33                       |
| BART     | 0.07 | 0.08 | 0.07 | 0.07 | 0.24 | 0.10 | 0.14 | 0.47 | 0.07                   | 0.24                       |
| IPSW-LR  | 0.13 | 0.16 | 0.14 | 0.13 | 0.32 | 0.22 | 0.26 | 0.35 | 0.14                   | 0.29                       |
| IPSW-RF  | 0.08 | 0.10 | 0.09 | 0.08 | 0.26 | 0.10 | 0.17 | 0.45 | 0.09                   | 0.24                       |
| IPSW-GBM | 0.11 | 0.13 | 0.11 | 0.10 | 0.29 | 0.12 | 0.21 | 0.39 | 0.11                   | 0.25                       |
| DR-LR    | 0.20 | 0.19 | 0.19 | 0.18 | 0.25 | 0.48 | 0.28 | 0.34 | 0.19                   | 0.34                       |
| DR-RF    | 0.14 | 0.14 | 0.14 | 0.14 | 0.21 | 0.40 | 0.24 | 0.37 | 0.14                   | 0.31                       |
| DR-GBM   | 0.17 | 0.17 | 0.17 | 0.16 | 0.24 | 0.41 | 0.26 | 0.35 | 0.17                   | 0.31                       |

Note: All results reported here average over 10,000 simulated datasets. Covariate distances between experimental and target datasets are minimized (see text). See Figures ?? and ?? for a description of the scenarios. (T) refers to simulations in which control outcomes are available in the target dataset. OLS denotes linear regression; BART denotes Bayesian Additive Regression Trees; IPSW-LR (IPSW-RF/IPSW-GBM) denotes inverse propensity score weighting with propensity scores estimated using logistic regression (random forests/boosting); DR-LR (DR-RF/DR-GBM) refers to double robust weighted linear regression models with propensity scores estimated using logistic regression (random forests/boosting). The last two columns show the average RSMSE for the ignorable (1–4) and non-ignorable (5–8) scenarios.
